# Supplementary material
Source: PubMed Central journal article supplement (PMC7266379)
Supplement: NIHMS1596905-supplement-3.pdf [file NIHMS1596905-supplement-3.pdf]

| Target                     | Drug             | IC <sub>50</sub> |               | Comparison of curve p-value |
|----------------------------|------------------|------------------|---------------|-----------------------------|
|                            |                  | shCtrl           | shDouble      |                             |
| <b>CDK1<br/>CDK2</b>       | Dinaciclib, nM   | <b>86.80</b>     | <b>52.85</b>  | <b>&lt;0.0001</b>           |
| <b>TOP2A</b>               | Doxorubicin, nM  | <b>193.1</b>     | <b>44.43</b>  | <b>&lt;0.0001</b>           |
|                            | Etoposide, μM    | <b>0.5596</b>    | <b>0.3712</b> | <b>0.1329</b>               |
| <b>BIRC5</b>               | Docetaxel, nM    | <b>18.84</b>     | <b>4.627</b>  | <b>&lt;0.0001</b>           |
|                            | YM155, nM        | <b>880.6</b>     | <b>118.6</b>  | <b>&lt;0.0001</b>           |
| <b>CHEK1</b>               | MK8776, μM       | <b>13.99</b>     | <b>3.177</b>  | <b>&lt;0.0001</b>           |
| <b>CHEK2</b>               | AZD7762, μM      | <b>3.629</b>     | <b>0.5672</b> | <b>0.0010</b>               |
| <b>PARP1<br/>PARP2</b>     | Olaparib, μM     | <b>31.53</b>     | <b>15.01</b>  | <b>0.0002</b>               |
| <b>Not in the<br/>list</b> | Cisplatin, μM    | <b>2.774</b>     | <b>3.560</b>  | <b>0.4516</b>               |
|                            | Temozolomide, μM | <b>220.5</b>     | <b>219.5</b>  | <b>0.4289</b>               |

IC50 of candidate drugs, and drugs not identified from the TRAP analysis. Comparison of the curve fits between the shDouble and shControl WFU3 cells was performed using extra sum-of-square F test.
