# Supplementary material
Source: PubMed Central journal article supplement (PMC7266379)
Supplement: NIHMS1596905-supplement-4.pdf [file NIHMS1596905-supplement-4.pdf]

WFU3

BHPPrE1

A

C

AV

| Treatment           | shCtrl  |         | shMap3k7 |         |
|---------------------|---------|---------|----------|---------|
|                     | F ratio | p value | F ratio  | p value |
| Doxo vs Dina + Doxo | 17.51   | 0.0005  | 403.4    | <0.0001 |
| Etop vs Dina + Etop | 20.08   | 0.0002  | 193.7    | <0.0001 |
| Doce vs Dina + Doce | 60.09   | <0.0001 | 61.61    | <0.0001 |
| Olap vs Dina + Olap | 270.3   | <0.0001 | 365.2    | <0.0001 |

| Treatment           | shCtrl  |         | shMAP3K7 |         |
|---------------------|---------|---------|----------|---------|
|                     | F ratio | p value | F ratio  | p value |
| Doxo vs Dina + Doxo | 123.7   | <0.0001 | 127.7    | <0.0001 |
| Etop vs Dina + Etop | 215.6   | <0.0001 | 209.3    | <0.0001 |
| Doce vs Dina + Doce | 452.9   | <0.0001 | 560.3    | <0.0001 |
| Olap vs Dina + Olap | 75.14   | <0.0001 | 343.0    | <0.0001 |

B

D

PI

| Treatment           | shCtrl  |         | shMap3k7 |         |
|---------------------|---------|---------|----------|---------|
|                     | F ratio | p value | F ratio  | p value |
| Doxo vs Dina + Doxo | 8.123   | 0.0099  | 133.1    | <0.0001 |
| Etop vs Dina + Etop | 7.589   | 0.0123  | 405.7    | <0.0001 |
| Doce vs Dina + Doce | 30.45   | <0.0001 | 117.8    | <0.0001 |
| Olap vs Dina + Olap | 32.89   | <0.0001 | 772      | <0.0001 |

| Treatment           | shCtrl  |         | shMAP3K7 |         |
|---------------------|---------|---------|----------|---------|
|                     | F ratio | p value | F ratio  | p value |
| Doxo vs Dina + Doxo | 149.6   | <0.0001 | 207.0    | <0.0001 |
| Etop vs Dina + Etop | 352.2   | <0.0001 | 218.3    | <0.0001 |
| Doce vs Dina + Doce | 709.0   | <0.0001 | 1147     | <0.0001 |
| Olap vs Dina + Olap | 123.4   | <0.0001 | 284.6    | <0.0001 |

Supplemental Table 12) Statistical analysis of data represented in Figure 4. Tables A, B, C and D correspond to figures 4 A, B, C, and D, respectively. See figure legend for Figure 4 for details.
